# Supplementary material
Source: PubMed Central journal article supplement (PMC7393388)
Supplement: NIHMS1021272-supplement-Suppl_material.pdf [file NIHMS1021272-supplement-Suppl_material.pdf]

# Supplemental Material

## Perceptions and acceptability of an experimental Ebola vaccine among health care workers, frontline staff, and the general public during the 2014-2015 Ebola outbreak in Sierra Leone

### Annex 1: Screener for Focus group Discussions

#### Formative Research with Healthcare Workers, Responders, and the General Public to Inform Sierra Leone Ebola Prevention Vaccine Study Communication

#### Screener for Focus Groups with Healthcare Workers, Responders, and the General Public

#### **ASK TO SPEAK WITH PERSON ON RECRUITMENT LIST/ROSTER OR IF CONTACT IS FACE-TO-FACE, CONFIRM THEY ARE THE PERSON ON THE RECRUITMENT LIST/ROSTER**

Hello, my name is \_\_\_\_\_. We are looking for [insert segment: healthcare workers, frontline staff, members of the general public] to talk to about their knowledge, attitudes and beliefs about Ebola, vaccines, and the upcoming Ebola prevention vaccine study in Sierra Leone to guide communication and education activities. I have a few brief questions, and if you qualify and are interested, I will invite you to take part in a focus group that will take place in the near future. May I ask you a few questions?

1. Are you a:

Clinician..... Determine if needed for segment, if yes continue  
**NOTE:** Clinicians include in-charge nurses, midwives, and community health officers (CHO)

Clinical Aide..... Determine if needed for segment, if yes continue  
**NOTE:** Clinical aides include maternal and child health (MCH) aides.

Frontline Staff..... Determine if needed for segment, if yes continue  
**NOTE:** Frontline staff includes cleaners, porters, ambulance and PHS drivers, burial worker, and social mobilizers visiting hotspots.

General Public..... Determine if needed for segment, if yes continue

**NOTE:** If the number of participants has been satisfied for a particular segment, thank and terminate. (Possibly ask to be on a wait list.)

2. If response to Question 1 was being a member of the general public, skip to Question 3.

If response to Question 1 was being a clinician, clinical aide or frontline staff:

Are you actively working in:

An Ebola care center..... Continue  
A non-Ebola related healthcare center..... Continue  
An Ebola response or burial team..... Continue  
None of the above..... Thank and Terminate

3. If response to Question 1 was being a member of the general public:

How old are you?

- Under 18 ..... Thank and Terminate
- 18-30 ..... Determine if needed for segment, if yes continue
- 31+ ..... Determine if needed for segment, if yes continue

**NOTE:** If the number of participants has been satisfied for a particular segment, thank and terminate.

**OR**

If response to Question 1 was being a clinician, clinical aide or public health staff:

Are you 18 years of age or older?

- Yes ..... Continue
- No ..... Thank and Terminate

4. Have you ever been diagnosed with Ebola Virus Disease (EVD)?

- No ..... Continue
- Yes ..... Thank and Terminate

5. Are you currently pregnant?

- No ..... Continue
- Yes ..... Thank and Terminate

6. Have you taken part in a clinical vaccine study before?

- No ..... Continue
- Yes ..... Thank and Terminate

7. Are you comfortable talking about your opinions in a group setting?

- Yes ..... Continue
- No ..... Thank and Terminate

8. What district do you live/work in?

- Bombali ..... Determine if needed for segment, if yes continue
- Port Loko ..... Determine if needed for segment, if yes continue
- Tonkolili ..... Determine if needed for segment, if yes continue
- Western Urban ..... Determine if needed for segment, if yes continue
- Western Rural ..... Determine if needed for segment, if yes continue

**NOTE:** If the number of participants has been satisfied for a particular segment, thank and terminate.

**INVITATION TO PARTICIPATE**

As I previously mentioned, we are conducting focus groups with [insert segment: healthcare workers, public health workers, members of the general public] such as yourself to get opinions on Ebola, vaccines, and the upcoming Ebola prevention vaccine study in Sierra Leone. The focus group will be held on [insert date] at [insert location]. It will last about an hour and a half. We would very much like you to participate.

We are only interested in your opinion on the topic. This is not a request to participate in the vaccine study.

Would you be available to join a focus group?

Yes .....Continue

No ..... Thank and Terminate

Please come to [insert location] at [insert time] on [insert date] to participate.

What is the best way to contact you? \_\_\_\_\_

**NOTE TO RECRUITERS:** When ending recruitment with a “Thank and Terminate” direction, say to respondent: “Those are all of the questions I have for you today. I would like to thank you for your time.”

Annex 2: Screener for In-depth Interviews

**Formative Research with Healthcare Decision-Makers to Inform Sierra Leone Ebola Prevention Vaccine Study Communications**

**Screener for In-depth Interviews with Physicians and Others Leading Ebola Response at District Level**

**ASK TO SPEAK WITH PERSON ON RECRUITMENT LIST/ROSTER OR IF CONTACT IS FACE-TO-FACE, CONFIRM THEY ARE THE PERSON ON THE RECRUITMENT LIST/ROSTER**

Hello, my name is \_\_\_\_\_. We are looking to talk with those leading efforts to respond to the Ebola outbreak about the planned Ebola prevention vaccine study in Sierra Leone to guide communication and education activities. I have a few brief questions, and if you qualify and are interested, I will invite you to take part in an interview that will take place in the near future. May I ask you a few questions?

1. Are you a:
  - District Medical Officer..... continue
  - Medical Superintendent..... continue
  - Head of District Burial Team..... continue
  - Head of ETU/EHC/CCC..... continue
  - District Surveillance Officer..... continue
  
2. Are you actively working in:
  - An Ebola care center.....Continue
  - A non-Ebola related healthcare center.....Continue
  - An Ebola response team.....Continue
  - None of the above..... Thank and Terminate
  
3. Are you 18years of age or older?
  - Yes.....Continue
  - No..... Thank and Terminate
  
4. Have you ever been diagnosed with Ebola Virus Disease (EVD)?
  - No.....Continue
  - Yes..... Thank and Terminate
  
5. Are you currently pregnant?
  - No.....Continue
  - Yes..... Thank and Terminate
  
6. Have you taken part in any investigational vaccine clinical trial before (such as influenza, malaria, yellow fever vaccine clinical study)?
  - No.....Continue

Yes ..... Thank and Terminate

7. What district do you live/work in?

Bombali..... Determine if needed for segment, if yes continue

Port Loko ..... Determine if needed for segment, if yes continue

Tonkolili..... Determine if needed for segment, if yes continue

Western Urban ..... Determine if needed for segment, if yes continue

Western Rural ..... Determine if needed for segment, if yes continue

**NOTE:** If the number of participants has been satisfied for a particular segment, thank and terminate. (Possibly ask to be on a wait list.)

**INVITATION TO PARTICIPATE**

As I previously mentioned, we are conducting interviews to get opinions on Ebola, vaccines, and the planned Ebola prevention vaccine study in Sierra Leone. The interviews will be held on [insert date] at [insert location]. They will last about an hour. We would very much like you to participate.

We are only interested in your opinion on the topic. This is not a request to participate in the vaccine study.

Would you be available to help with this study?

Yes ..... Continue

No ..... Thank and Terminate

Please come to [insert location] at [insert time] on [insert date] to participate.[]

What is the best way to contact you? \_\_\_\_\_

Those are all of the questions I have for you today. Thank you for your time. We appreciate your participation.

**NOTE TO RECRUITERS:** When ending recruitment with a “Thank and Terminate” direction, say to respondent: “Those are all of the questions I have for you today. I would like to thank you for your time.”

## Annex 3: Focus Group Moderators Guide – Health Care and Front Line Workers

### **INTRODUCTION**

Hello. My name is \_\_\_\_\_. Thank you for joining our discussion today. We would like to hear your thoughts and opinions about a vaccine that could help protect against Ebola. We will also be reviewing and discussing some educational materials that have been developed about an Ebola prevention vaccine study.

The sponsor of this discussion is the U.S. Centers for Disease Control and Prevention (CDC) and the CDC Foundation. I do not work for them. I am just helping to gather your honest thoughts and opinions to share with them so they can understand the best ways to communicate with you about the Ebola Prevention Vaccine study that is being planned. You may be eligible to participate in that study, and more information about it will be given to you at the end of the discussion.

Feel free to make positive or negative comments about any of the things we'll be discussing today. This is a free-flowing discussion and there are no wrong answers. I also want to assure you that I had nothing to do with creating the materials we'll be looking at. I will not be offended in any way by anything you say so please feel free to speak your mind.

\_\_\_\_\_ is here to help me by taking notes. With your permission, we'd also like to audiotape this discussion so we can make sure to capture everything that is said for our report. The audio tapes will be kept separate from anything with your name on it, and will be destroyed as soon as we have gathered the notes for our report. Nothing personal about you will be included in the report or shared with anyone at CDC, not even your full name. If you don't feel comfortable answering a particular question, you do not have to. You can leave at any time. The restroom is located \_\_\_\_\_. Please feel free to use it if you need, or to get more refreshments during the discussion.

**Any questions? Do you agree to participate in this discussion?**

**[Get verbal consent from all participants; those that don't consent should be asked to leave]**

**Do you agree to have this discussion audio-taped?**

**[Only audio tape if ALL participants agree]**

To help us have a good discussion and be respectful of everyone here, please:

- Talk one at a time and in a voice at least as loud as mine.
- Let everyone have a chance to share their thoughts —nobody talks too much and nobody talks too little.
- Be open and honest. There are no right or wrong answers to the questions I ask—there are different points of view. It's valuable for me to hear all points of view, so it's especially important to speak up when you disagree with what someone else has said. There is no penalty for disagreeing with or criticizing what I share with you today.
- Turn off or silence your cell phones so they don't interrupt or distract us.
- Do not share personal opinions expressed during this discussion with others outside the room.

## A. Introductory Questions

1. First, please tell me what name you'd like to be called today.

Now, I'd like to start by learning a bit about your work.

2. What kind of work do you do at the health center or on an Ebola response team?
3. How long have you been doing that work?
4. How has your typical workday changed since Ebola has come into the community?
5. What do your family and community members think about your work?

### **PROBE:**

Do they have concerns about you being around people sick with Ebola?  
Are workers like you still welcome in your communities, mosques, etc.?

## B. Attitudes and Beliefs about Ebola

1. How serious do you think Ebola is? Why?
2. One a scale of 0 to 10, where 0 means definitely not and 10 means definitely, how likely are you to get Ebola? How likely are others in your community? Why?
3. What can you do to keep yourself and others from getting sick with Ebola? Anything else?

### **PROBE:**

How easy or difficult is it for you to do those things?  
How well do you think those actions protect you from Ebola?

4. Compared to a month ago, do you think more people are getting sick from Ebola in Sierra Leone, or less?

## C. Perceptions and Attitudes about Ebola Prevention Vaccine and Study

1. Have you heard anything before today about a vaccine to protect against Ebola?

### **IF YES, PROBE:**

What have you heard?

What do you think about this?

Where/who did you hear it from?

Which words have you heard the vaccine called – Ebola vaccine? Ebola marklate? Ebola prevention vaccine? Anti-Ebola vaccine? Something else? Do you have a preference?

Currently there are no approved vaccines against Ebola, but there are efforts to develop them. They are being studied in a small number of people in Europe, the United States of America, and some African nations and so far appear to be safe. But it is not yet known how much protection these vaccines will provide against getting sick with Ebola. In order to find that out, the vaccines must be studied among people at risk of Ebola, such as people living in countries with Ebola outbreaks.

The U.S. CDC is working with the Sierra Leone College of Medicine and Allied Health Sciences, the Ministry of Health and sanitation, and many other partners to plan a vaccine study here in Sierra Leone. Ebola vaccine will be offered to those who are more likely to be at risk for Ebola because of their job, like health care workers. These people can choose to be part of the study, but are not required to take the vaccine. Giving the vaccine to people more likely to be at risk of Ebola can help us know if the vaccine works. If the vaccine works and does not cause serious side effects, more doses can be made and eventually given to others in Sierra Leone.

2. Have you heard anything before today about this planned study?

**IF YES, PROBE:**

What have you heard?

Where/who did you hear it from?

Which words have you heard the study called? Do you have a preference?

3. What do you think about this planned study?
4. What questions do you have about the study?

**D. Factors that May Influence Study Participation**

1. Why might people want to participate in this study? PROBE: Any other reasons?
2. Why might people NOT want to participate in this study? PROBE: Any other reasons?
3. What might make it challenging for people to participate in the study? PROBE: What else?
4. What might make it easier for people to participate? PROBE: What else?
5. As mentioned, only people at high risk for Ebola disease because of their job will be able to participate in the study. If you choose to participate, you will get the vaccine as part of the study but nobody else in your family would be able to receive the vaccine yet, unless they are at highest risk for Ebola like you. If the study shows the vaccine helps prevent Ebola and does not cause serious side effects, more doses could be made and eventually given to others in Sierra Leone.
  - a. How might this affect your decision about participating? Why?
  - b. If you decide to participate, how would explain that to your family and community?
  - c. How do you think your family, friends, and community would feel about you getting the vaccine? Do you think they will be supportive of your involvement in the study? Why or why not?
  - d. Do you think your friends, peers, family and community members would also want the vaccine if it becomes widely available? Why or why not?

**E. Preferred Communication Channels and Influencers**

1. How have you been getting information about Ebola prevention? Which of those is the best way to reach you with information about the vaccine study? Are there any other ways to reach you about the vaccine study?



2. Who would you trust to go to for advice before you make a decision about participating in the study? Why?
3. In your community might there be anyone who would not welcome the Ebola vaccine study (individuals or organizations)? Why? Who would be the best people to talk with them about the Ebola vaccine study?

### **Closing**

Thinking about everything we've discussed [today/tonight], is there any additional information about the Ebola prevention vaccine study that would be helpful to you?

### **[Participants should have a piece of paper in front of them]**

Those are all the questions I have for our discussion today. I thank each of you for sharing your thoughts and opinions with us. Before you leave, please fill out this brief survey and put it in this envelope. You don't need to put your name on it.

### **[Hand out post-survey]**

Thank you for your time and please be careful getting home.

## Annex 4: Focus Group Moderators Guide – General Public

### **INTRODUCTION**

Hello. My name is \_\_\_\_\_. Thank you for joining our discussion today. We would like to hear your thoughts and opinions about a vaccine that could help protect against Ebola. We will also be reviewing and discussing some educational materials that have been developed about an Ebola prevention vaccine study.

The sponsor of this discussion is the U.S. Centers for Disease Control and Prevention (CDC) and the CDC Foundation. I do not work for them. I am just helping to gather your honest thoughts and opinions to share with them so they can understand the best ways to communicate with you about the Ebola Prevention Vaccine study that is being planned. A member of your family or community may be eligible to join this study if they have a job that puts them at high risk for Ebola, like a doctor or burial worker.

We know you will have many questions. We are not the experts on the Ebola vaccines. We want to know your questions, and the things you like and do not like so the Government and those bringing the Ebola Prevention Vaccine study can understand your questions and concerns so they can try to answer those questions for everybody.

No one should feel ashamed to talk. We want to hear your own ideas, the things you like and the things you don't like. Feel free to make positive or negative comments about any of the things we'll be discussing today. Say what you think. There are no right or wrong answers. I also want to assure you that I had nothing to do with creating the materials we'll be looking at. I will not be offended in any way by anything you say so please feel free to speak your mind.

I will do the talking and my friend will write down what you say, so we do not forget. If you all agree, we would also like to audio tape the discussion so that we can make sure to capture everything that was said. Once we have gathered our notes, the tapes will be destroyed. Nothing personal about you, or your name, will be included in the report or shared with anyone at CDC, not even your full name. If you do not feel comfortable answering a particular question, you do not have to. You can leave at any time. The restroom is located \_\_\_\_\_. Please feel free to use it if you need, or to get more refreshments during the discussion.

When we are finished with our own questions, you can ask any other question about the Ebola vaccine test. **We do not have the answers. We will write down all the questions and take them back. That is why we are here- to find out what you want to know.**

We will not take too long. We will talk for about 1 and a half hours. We want you to stay with us until the end, but if you are not able, you can leave before we start.

**Any questions? Do you agree to participate in this discussion?**

**[Get written consent from all participants; those that don't consent should be asked to leave]**

**Do you all agree to have the discussion audio-taped?**

**[Only audio tape if ALL participants agree]**

To help us have a good discussion and be respectful of everyone here, please:

- Talk one at a time and in a voice at least as loud as mine.
- Let everyone have a chance to share their thoughts —nobody talks too much and nobody talks too little.
- Be open and honest. There are no right or wrong answers to the questions I ask—there are different points of view. It’s valuable for me to hear all points of view, so it’s especially important to speak up when you disagree with what someone else has said. There is no penalty for disagreeing with or criticizing what I share with you today.
- Turn off or silence your cell phones so they don’t interrupt or distract us.
- Do not share personal opinions expressed during this discussion with others outside the room.

### **A. Introductory Questions**

1. First, please tell me what name you’d like to be called today, how old you are, and how much education you have (primary, secondary, high school college, university)
2. If you had a question and wanted information about your health who or where would you go to find the answer? Is there anyone else you trust to give you information about your health?
3. What do you know about vaccines (what can vaccines do)?
4. What are some of the vaccines that you know?
5. What are the benefits of taking those vaccines (what you can take vaccine for)?

### **B. Attitudes and Beliefs about Ebola**

1. How serious do you think Ebola is? Why?
2. One a scale of 0 to 10, where 0 means definitely not and 10 means definitely, how likely are you to get Ebola? How likely are others in your community? Why?
3. Who, in your opinion, is at high risk for getting Ebola? What puts them at high risk?

#### **PROBE:**

What level of risk are doctors, sprayers or burial workers at for getting Ebola (low, medium, high risk)? How do you feel about that?

Do you have concerns about being around family or community members who work at care centers or on Ebola Response Teams?

Are these workers still welcome in your communities, mosques, etc.?

4. What can you do to keep yourself and others from getting sick with Ebola? Anything else?

#### **PROBE:**

Where or from whom did you get this information?

What’s the best way to reach you with information on Ebola?

5. Compared to a month ago, do you think more people are getting sick from Ebola in Sierra Leone, or less?

### C. Perceptions and Attitudes about Ebola Prevention Vaccine and Study

1. Before today, have you heard anything in your community about Ebola vaccines?

**IF YES, PROBE:**

Which words have you heard the vaccine called – Ebola vaccine? Ebola prevention vaccine? Anti-Ebola vaccine? Ebola marklate? Something else? Do you have a preference?

2. What have you heard? Where did you hear it/how did you get the news?
3. Do you believe this? Why or why not?
4. What about others in the community? What do they think?

5. Are people talking about Ebola vaccine plenty in your community?

Currently there are no approved vaccines against Ebola, but there are efforts to develop them. They are being studied in a small number of people in Europe, the United States of America, and some African nations and so far appear to be safe. But it is not yet known how much protection these vaccines will provide against getting sick with Ebola. In order to find that out, the vaccines must be studied among people at risk of Ebola, such as people living in countries with Ebola outbreaks.

The U.S. CDC is working with the Sierra Leone College of Medicine and Allied Health Sciences, the Ministry of Health and sanitation, and many other partners to plan a vaccine study here in Sierra Leone. Ebola vaccine will be offered to those who are more likely to be at risk for Ebola because of their jobs, like health care workers. These people can choose to be part of the study, but are not required to take the vaccine. Giving the vaccine to people more likely to be at risk of Ebola can help us know if the vaccine works. If the study shows the vaccine helps prevent Ebola and does not cause serious side effects, more doses could be made and eventually given to others in Sierra Leone.

6. Have you heard about this vaccine study?

**PROBE:**

How did you hear about it? What did you hear?

Which words have you heard the study called? Do you have a preference?

How do you feel about the study? Would it be a good thing? Why or why not?

7. What would you want to know about the Ebola vaccine study?
8. Who would you want to get information from about the vaccine study? Why would you believe that person?
9. How does it make you feel knowing that only some people will be able to get the vaccine as part of the study?

10. How would you feel if someone in your family or community were to take part in the study?  
Why?

11. In your community, are there any groups that would not welcome the Ebola vaccine study?

**PROBE:**

Which groups of people?

Why would they not welcome?

Who would be the best people to talk to them about the vaccine study in order to gain their understanding and support?

12. Is there anything else you would like to say?

**CLOSING**

Let's do one last exercise before we wrap up our discussion. Thinking about everything we've discussed [today/tonight], is there any additional information about the Ebola prevention vaccine study that would be helpful to you?

**[Participants should have a piece of paper in front of them]**

Those are all the questions I have for our discussion today. I thank each of you for sharing your thoughts and opinions with us. Everyone please be careful getting home.

## Annex 5: In-depth Interview Guide –Public Health Leaders

### INTRODUCTION

Hello. My name is \_\_\_\_\_. Thank you for talking with me today. We would like to hear your thoughts and opinions about a vaccine that could help protect against Ebola. We will also be reviewing and discussing some educational materials that have been developed about an Ebola prevention vaccine study.

The sponsor of this discussion is the U.S. Centers for Disease Control and Prevention (CDC) and the CDC Foundation. I do not work for them. I am just helping to gather your honest thoughts and opinions to share with them so they can understand the best ways to communicate with you about the Ebola Prevention Vaccine study that is being planned. You may be eligible to participate in that study, and more information about it will be given to you at the end of the discussion.

Feel free to make positive or negative comments about any of the things we'll be discussing today. There are no right or wrong answers. I also want to assure you that I had nothing to do with creating the materials we'll be looking at. I will not be offended in any way by anything you say so please feel free to speak your mind.

\_\_\_\_\_ is here to help me by taking notes. With your permission, we'd also like to audiotape this interview so we can make sure to capture everything for our report. The audio tapes will be kept separate from anything with your name on it, and will be destroyed as soon as we have gathered the notes for our report. Nothing personal about you will be included in the report or shared with anyone at CDC, not even your full name. If you don't feel comfortable answering a particular question, you do not have to. You can leave at any time.

**Any questions? Do you agree to participate in this discussion? Do you agree to be audio-taped?**

**[IF participant agrees, begin audio recording]**

#### **A. Introductory Questions**

1. First, please tell me what you'd like to be called today.
2. What kind of work do you do and how long have you been in this position?
3. How has your typical workday changed since Ebola has come into the community?
4. What does your family think about your work?  
What do community members think about your work?

#### **B. Ebola Vaccine Study**

1. Have you heard anything before today about a **vaccine** to protect against Ebola?  
**IF YES, PROBE:**  
What have you heard?  
What do you think about this?  
Where/who did you hear it from? (probe individuals and/or organizations)  
Do you believe the information? Why or why not? What about others in the community? What do they think?  
Are people talking about Ebola vaccine in your community?

Which words have you heard the vaccine called? Ebola vaccine? Ebola marklate? Ebola prevention vaccine? Anti-Ebola vaccine? Something else? Do you have a preference? Who would you want to give you information about an Ebola vaccine?

2. What do you know about how a vaccine is tested and approved to be used?

Currently there are no approved vaccines against Ebola, but there are efforts to develop them. They are being studied in a small number of people in Europe, the United States of America, and some African nations and so far appear to be safe. But it is not yet known how much protection these vaccines will provide against getting sick with Ebola. In order to find that out, the vaccines must be studied among people at risk of Ebola, such as people living in countries with Ebola outbreaks.

The U.S. CDC is working with the Sierra Leone College of Medicine and Allied Health Sciences, the Ministry of Health and sanitation, and many other partners to plan a vaccine study here in Sierra Leone. Ebola vaccine will be offered to those who are more likely to be at risk for Ebola because of their jobs, like healthcare workers. These people can choose to be part of the study, but are not required to take the vaccine. Giving the vaccine to people more likely to be at risk of Ebola can help us know if the vaccine works. If the study shows the vaccine help prevent Ebola and does not cause serious side effects, more doses could be made and eventually given to others in Sierra Leone.

3. Have you heard anything before today about this planned study?

**IF YES, PROBE:**

What have you heard?

Where/who did you hear it from? (probe individual and organizations)

Do you trust this information?

Which words have you heard the study called? Do you have a preference?

What words would you use to explain the study to your Colleagues? Friends and family? Community?

4. What do you think about this planned study?
5. What questions do you have about the study?
6. Why might healthcare and frontline workers helping with the Ebola response want to participate in this study? Why else?
7. Why might they NOT want to participate in this study? Any other reasons?
8. What might make it challenging for healthcare and frontline workers helping with the Ebola response to participate in the study? What else?
9. What might make it easier for them to participate? What else?
10. What information would you or your healthcare and frontline colleagues want to know before deciding to participate in the study and receive the Ebola vaccine?  
**PROBE:** who would you want to get information from (individuals and organizations)? Why?
11. As mentioned, only people at high risk for Ebola disease because of their job will be able to participate in the study. If you choose to participate, you will get the vaccine as part of the study but nobody else in your family would be able to receive the vaccine yet, unless they are at high

risk for Ebola like you. If the study shows the vaccine helps protect against Ebola and does not cause serious side effects, more doses of the vaccine could be made and eventually available to others.

- a. How might this affect your decision about participating? Why?
- b. If you decide to participate, how would explain that to your family and community?
- c. How do you think your family, friends, and community would feel about you taking part in the vaccine study and getting the vaccine? Do you think they will be supportive of your involvement in the study? Why or why not?
- d. How would you feel if your colleagues took part in the vaccine study? Why?
- e. Do you think your friends, peers, family and community members would also want the vaccine if it becomes widely available? Why or why not?

### **C. Preferred Communication Channels and Influencers**

1. What is the best way to reach you with information about the vaccine study? How about healthcare worker and/or frontline staff? Are there any other ways?
2. Who would you trust to go to for advice before you make a decision about participating in the study? Why?
3. In your community are there any groups that would not welcome the Ebola vaccine study (individuals or organizations)? Which groups of people? Why? Who would be the best people to talk with them about the study?
4. In your role (family, clinic/hospital, community leader) would you feel comfortable taking to your colleagues and the community about the Ebola vaccine study? Why or why not?

### **CLOSING**

1. Let's do one last exercise before we wrap up our discussion. Thinking about everything we've discussed [today/tonight], is there any additional information about the Ebola prevention vaccine study that would be helpful to you?
2. Is there anything else you would like to tell us?

### **[Participants should have a piece of paper in front of them]**

Those are all the questions I have for our discussion today. I thank each of you for sharing your thoughts and opinions with us. Everyone please be careful getting home.
